# Supplementary material
Source: ML conference proceedings conference paper supplement (https://proceedings.neurips.cc/paper_files/paper/2013/hash/242c100dc94f871b6d7215b868a875f8-Abstract.html)
Supplement: Supplementary file [file 242c100dc94f871b6d7215b868a875f8-Supplemental.zip]

## A Proofs for Section 4

### A.1 Proof of the Initialization Step

*Proof of Theorem 4.1.* Recall that  $\mathbf{x}^0$  is the top singular vector of  $\mathbf{S} = \frac{1}{n} \sum_{\ell} |\mathbf{a}_{\ell}^T \mathbf{x}^*|^2 \mathbf{a}_{\ell} \mathbf{a}_{\ell}^T$ . As  $\mathbf{a}_{\ell}$  are rotationally invariant random variables, wlog, we can assume that  $\mathbf{x}^* = \mathbf{e}_1$  where  $\mathbf{e}_1$  is the first canonical basis vector. Also note that  $\mathbb{E} [|\langle \mathbf{a}, \mathbf{e}_1 \rangle|^2 \mathbf{a} \mathbf{a}^T] = \mathbf{D}$ , where  $\mathbf{D}$  is a diagonal matrix with  $D_{11} = \mathbb{E}_{a \sim \mathcal{N}_C(0,1)}[|a|^4] = 8$  and  $D_{ii} = \mathbb{E}_{a \sim \mathcal{N}_C(0,1), b \sim \mathcal{N}_C(0,1)}[|a|^2 |b|^2] = 1, \forall i > 1$ .

We break our proof of the theorem into two steps:

(1): Show that, with probability  $> 1 - \frac{4}{m^2}$ :  $\|\mathbf{S} - \mathbf{D}\|_2 < c/4$ .

(2): Use (1) to prove the theorem.

**Proof of Step (2):** We have  $\langle \mathbf{x}^0, \mathbf{S} \mathbf{x}^0 \rangle \leq c/4 + 3 \left( (\mathbf{x}^0)^T \mathbf{e}_1 \right)^2 + \sum_{i=2}^n (\mathbf{x}^0_i)^2 = c/4 + 2 \left( (\mathbf{x}^0)^T \mathbf{e}_1 \right)^2 + 1$ . On the other hand, since  $\mathbf{x}^0$  is the top singular value of  $\mathbf{S}$ , by using triangle inequality, we have  $\langle \mathbf{x}^0, \mathbf{S} \mathbf{x}^0 \rangle > 3 - c/4$ . Hence,  $\langle \mathbf{x}^0, \mathbf{e}_1 \rangle^2 > 1 - c/2$ . This yields  $\|\mathbf{x}^0 - \mathbf{x}^*\|_2^2 = 2 - 2\langle \mathbf{x}^0, \mathbf{e}_1 \rangle^2 < c$ .

**Proof of Step (1):** We now complete our proof by proving (1). To this end, we use the following matrix concentration result from [26]:

**Theorem A.1** (Theorem 1.5 of [26]). *Consider a finite sequence  $\mathbf{X}_i$  of self-adjoint independent random matrices with dimensions  $n \times n$ . Assume that  $\mathbb{E}[\mathbf{X}_i] = 0$  and  $\|\mathbf{X}_i\|_2 \leq R, \forall i$ , almost surely. Let  $\sigma^2 := \|\sum_i \mathbb{E}[\mathbf{X}_i]\|_2$ . Then the following holds  $\forall \nu \geq 0$ :*

$$P \left( \left\| \frac{1}{m} \sum_{i=1}^m \mathbf{X}_i \right\|_2 \geq \nu \right) \leq 2n \exp \left( \frac{-m^2 \nu^2}{\sigma^2 + Rm\nu/3} \right).$$

Note that Theorem A.1 assumes  $\max_{\ell} |a_{1\ell}|^2 \|\mathbf{a}_{\ell}\|^2$  to be bounded, where  $a_{1\ell}$  is the first component of  $\mathbf{a}_{\ell}$ . However,  $\mathbf{a}_{\ell}$  is a normal random variable and hence can be unbounded. We address this issue by observing that probability that  $\Pr(\|\mathbf{a}_{\ell}\|^2 \geq 2n \text{ OR } |a_{1\ell}|^2 \geq 2 \log m) \leq 2 \exp(-n/2) + \frac{1}{m^2}$ . Hence, for large enough  $n, \hat{c}$  and  $m > \hat{c}n$ , w.p.  $1 - \frac{3}{m^2}$ ,

$$\max_{\ell} |a_{1\ell}|^2 \|\mathbf{a}_{\ell}\|^2 \leq 4n \log(m). \quad (6)$$

Now, consider truncated random variable  $\tilde{\mathbf{a}}_{\ell}$  s.t.  $\tilde{\mathbf{a}}_{\ell} = \mathbf{a}_{\ell}$  if  $|a_{1\ell}|^2 \leq 2 \log(m)$  &  $\|\mathbf{a}_{\ell}\|^2 \leq 2n$  and  $\tilde{\mathbf{a}}_{\ell} = 0$  otherwise. Now, note that  $\tilde{\mathbf{a}}_{\ell}$  is symmetric around origin and also  $\mathbb{E}[\tilde{a}_{i\ell} \tilde{a}_{j\ell}] = 0, \forall i \neq j$ . Also,  $\mathbb{E}[|\tilde{a}_{i\ell}|^2] \leq 1$ . Hence,  $\|\mathbb{E}[|\tilde{a}_{1\ell}|^2 \tilde{\mathbf{a}}_{\ell} \tilde{\mathbf{a}}_{\ell}^{\dagger}]\|_2 \leq 4n \log(m)$ . Now, applying Theorem A.1 given above, we get (w.p.  $\geq 1 - 1/m^2$ )

$$\left\| \frac{1}{m} \sum_{\ell} |\tilde{a}_{1\ell}|^2 \tilde{\mathbf{a}}_{\ell} \tilde{\mathbf{a}}_{\ell}^{\dagger} - \mathbb{E}[|\tilde{a}_{1\ell}|^2 \tilde{\mathbf{a}}_{\ell} \tilde{\mathbf{a}}_{\ell}^{\dagger}] \right\|_2 \leq \frac{4n \log^{3/2}(m)}{\sqrt{m}}.$$

Furthermore,  $\mathbf{a}_{\ell} = \tilde{\mathbf{a}}_{\ell}$  with probability larger than  $1 - \frac{3}{m^2}$ . Hence, w.p.  $\geq 1 - \frac{4}{m^2}$ :

$$\|S - \mathbb{E}[|\tilde{\mathbf{a}}_1|^2 \tilde{\mathbf{a}}_{\ell} \tilde{\mathbf{a}}_{\ell}^{\dagger}]\|_2 \leq \frac{4n \log^{3/2}(m)}{\sqrt{m}}.$$

Now, the remaining task is to show that  $\|\mathbb{E}[|\tilde{\mathbf{a}}_1|^2 \tilde{\mathbf{a}}_{\ell} \tilde{\mathbf{a}}_{\ell}^{\dagger}] - \mathbb{E}[|\mathbf{a}_1|^2 \mathbf{a}_{\ell} \mathbf{a}_{\ell}^{\dagger}]\|_2 \leq \frac{1}{m}$ . This follows easily by observing that  $\mathbb{E}[\tilde{\mathbf{a}}_{\ell}^i \tilde{\mathbf{a}}_{\ell}^j] = 0$  and by bounding  $\mathbb{E}[|\tilde{\mathbf{a}}_1|^2 |\tilde{\mathbf{a}}_{\ell}^i|^2] - |\mathbf{a}_1|^2 |\mathbf{a}_{\ell}^i|^2 \leq 1/m$  by using a simple second and fourth moment calculations for the normal distribution.

□

### A.2 Proof of per step reduction in error

In all the lemmas in this section,  $\delta$  is a small numerical constant (can be taken to be 0.01).

**Lemma A.2.** Assume the hypothesis of Theorem 4.2 and let  $\mathbf{x}^+$  be as defined in (3). Then, there exists an absolute numerical constant  $c$  such that the following holds (w.p.  $\geq 1 - \frac{\eta}{4}$ ):  $\left\| (\mathbf{A}\mathbf{A}^T)^{-1} \mathbf{A} (\mathbf{D} - \mathbf{I}) \mathbf{A}^T \mathbf{x}^* \right\|_2 < c \text{dist}(\mathbf{x}^*, \mathbf{x})$ .

*Proof.* Using (4) and the fact that  $\|\mathbf{x}^*\|_2 = 1$ ,  $\mathbf{x}^{*T} \mathbf{x}^+ = 1 + \mathbf{x}^{*T} (\mathbf{A}\mathbf{A}^T)^{-1} \mathbf{A} (\mathbf{D} - \mathbf{I}) \mathbf{A}^T \mathbf{x}^*$ . That is,  $|\mathbf{x}^{*T} \mathbf{x}^+| \geq 1 - \left\| \left( \frac{1}{2m} \mathbf{A}\mathbf{A}^T \right)^{-1} \right\|_2 \left\| \frac{1}{\sqrt{2m}} \mathbf{A} \right\|_2 \left\| \frac{1}{\sqrt{2m}} (\mathbf{D} - \mathbf{I}) \mathbf{A}^T \mathbf{x}^* \right\|_2$ . Now, using standard bounds on the singular values of Gaussian matrices [27] and assuming  $m > \widehat{c} \log \frac{1}{\eta} n$ , we have (w.p.  $\geq 1 - \frac{\eta}{4}$ ):  $\left\| \left( \frac{1}{2m} \mathbf{A}\mathbf{A}^T \right)^{-1} \right\|_2 \leq 1/(1 - 2/\sqrt{\widehat{c}})^2$  and  $\|\mathbf{A}\|_2 \leq 1 + 2/\sqrt{\widehat{c}}$ . Note that both the quantities can be bounded by constants that are close to 1 by selecting a large enough  $\widehat{c}$ . Also note that  $\frac{1}{2m} \mathbf{A}\mathbf{A}^T$  converges to  $\mathbf{I}$  (the identity matrix), or equivalently  $\frac{1}{m} \mathbf{A}\mathbf{A}^T$  converges to  $2\mathbf{I}$  since the elements of  $A$  are standard normal complex random variables and not standard normal real random variables.

The key challenge now is to bound  $\left\| (\mathbf{D} - \mathbf{I}) \mathbf{A}^T \mathbf{x}^* \right\|_2$  by  $c\sqrt{m} \text{dist}(\mathbf{x}^*, \mathbf{x}^t)$  for a global constant  $c > 0$ . Note that since (4) is invariant with respect to  $\|\mathbf{x}^t\|_2$ , we can assume that  $\|\mathbf{x}^t\|_2 = 1$ . Note further that, since the distribution of  $\mathbf{A}$  is rotationally invariant and is independent of  $\mathbf{x}^*$  and  $\mathbf{x}^t$ , wlog, we can assume that  $\mathbf{x}^* = \mathbf{e}_1$  and  $\mathbf{x}^t = \alpha \mathbf{e}_1 + \sqrt{1 - \alpha^2} \mathbf{e}_2$ , where  $\alpha = \langle \mathbf{x}^t, \mathbf{x}^* \rangle$ .

Hence,  $\left\| (\mathbf{D} - \mathbf{I}) \mathbf{A}^T \mathbf{e}_1 \right\|_2^2 = \sum_{l=1}^m |a_{1l}|^2 \left| \text{Ph} \left( (\alpha \bar{a}_{1l} + \sqrt{1 - \alpha^2} \bar{a}_{2l}) a_{1l} \right) - 1 \right|^2 = \sum_{l=1}^m U_\ell$ , where  $U_\ell$  is given by,

$$U_\ell \stackrel{\text{def}}{=} |a_{1l}|^2 \left| \text{Ph} \left( (\alpha \bar{a}_{1l} + \sqrt{1 - \alpha^2} \bar{a}_{2l}) a_{1l} \right) - 1 \right|^2. \quad (7)$$

Using Lemma A.3 finishes the proof.  $\square$

The following lemma, Lemma A.3 shows that if  $U_\ell$  are as defined in Lemma A.2 then, the sum of  $U_\ell, 1 \leq \ell \leq m$  concentrates well around  $\mathbb{E}[U_\ell]$  and also  $\mathbb{E}[U_\ell] \leq c\sqrt{m} \text{dist}(\mathbf{x}^*, \mathbf{x}^t)$ . The proof of Lemma A.3 requires careful analysis as it provides tail bound and expectation bound of a random variable that is a product of correlated sub-exponential complex random variables.

**Lemma A.3.** Assume the hypothesis of Lemma A.2. Let  $U_\ell$  be as defined in (7) and let each  $a_{1l}, a_{2l}, \forall 1 \leq l \leq m$  be sampled from standard normal distribution for complex numbers. Then, with probability greater than  $1 - \frac{\eta}{4}$ , we have:  $\sum_{l=1}^m U_\ell \leq c^2 m(1 - \alpha^2)$ , for a global constant  $c > 0$ .

*Proof of Lemma A.3.* We first estimate  $\mathbb{P}[U_\ell > t]$  so as to:

1. Calculate  $\mathbb{E}[U_\ell]$  and,
2. Show that  $U_\ell$  is a subexponential random variable and use that fact to derive concentration bounds.

Now,  $\mathbb{P}[U_\ell > t] = \int_{\frac{\sqrt{t}}{2}}^{\infty} p_{|a_{1l}|}(s) \mathbb{P} \left[ W_\ell > \frac{\sqrt{t}}{s} \mid |a_{1l}| = s \right] ds$ , where,

$$W_\ell \stackrel{\text{def}}{=} \left| \text{Ph} \left( (\alpha \bar{a}_{1l} + \sqrt{1 - \alpha^2} \bar{a}_{2l}) a_{1l} \right) - 1 \right|.$$

$$\begin{aligned}
\mathbb{P} \left[ W_l > \frac{\sqrt{t}}{s} \middle| |a_{1l}| = s \right] &= \mathbb{P} \left[ \left| \text{Ph} \left( \left( \alpha \bar{a}_{1l} + \sqrt{1 - \alpha^2} \bar{a}_{2l} \right) a_{1l} \right) - 1 \right| > \frac{\sqrt{t}}{s} \middle| |a_{1l}| = s \right] \\
&= \mathbb{P} \left[ \left| \text{Ph} \left( 1 + \frac{\sqrt{1 - \alpha^2} \bar{a}_{2l}}{\alpha \bar{a}_{1l}} \right) - 1 \right| > \frac{\sqrt{t}}{s} \middle| |a_{1l}| = s \right] \\
&\stackrel{(\zeta_1)}{\leq} \mathbb{P} \left[ \frac{\sqrt{1 - \alpha^2} |a_{2l}|}{\alpha |a_{2l}|} > \frac{c\sqrt{t}}{s} \middle| |a_{1l}| = s \right] \\
&= \mathbb{P} \left[ |a_{2l}| > \frac{c\alpha\sqrt{t}}{\sqrt{1 - \alpha^2}} \right] \\
&\stackrel{(\zeta_2)}{\leq} \exp \left( 1 - \frac{c\alpha^2 t}{1 - \alpha^2} \right),
\end{aligned}$$

where  $(\zeta_1)$  follows from Lemma A.7 and  $(\zeta_2)$  follows from the fact that  $a_{2l}$  is a sub-gaussian random variable. So we have:

$$\mathbb{P} [U_l > t] \leq \int_{\frac{\sqrt{t}}{2}}^{\infty} \exp \left( 1 - \frac{c\alpha^2 t}{1 - \alpha^2} \right) ds = \exp \left( 1 - \frac{c\alpha^2 t}{1 - \alpha^2} \right) \int_{\frac{\sqrt{t}}{2}}^{\infty} se^{-\frac{s^2}{2}} ds = \exp \left( 1 - \frac{ct}{1 - \alpha^2} \right). \quad (8)$$

Using this, we have the following bound on the expected value of  $U_l$ :

$$\mathbb{E} [U_l] = \int_0^{\infty} \mathbb{P} [U_l > t] dt \leq \int_0^{\infty} \exp \left( 1 - \frac{ct}{1 - \alpha^2} \right) dt \leq c(1 - \alpha^2). \quad (9)$$

From (8), we see that  $U_l$  is a subexponential random variable with parameter  $c(1 - \alpha^2)$ . Using Proposition 5.16 from [27], we obtain:

$$\begin{aligned}
\mathbb{P} \left[ \left| \sum_{l=1}^m U_l - \mathbb{E} [U_l] \right| > \delta m (1 - \alpha^2) \right] &\leq 2 \exp \left( - \min \left( \frac{c\delta^2 m^2 (1 - \alpha^2)^2}{(1 - \alpha^2)^2 m}, \frac{c\delta m (1 - \alpha^2)}{1 - \alpha^2} \right) \right) \\
&\leq 2 \exp (-c\delta^2 m) \leq \frac{\eta}{4}.
\end{aligned}$$

So, with probability greater than  $1 - \frac{\eta}{4}$ , we have:

$$\sum_{l=1}^m U_l \leq c^2 m (1 - \alpha^2).$$

This proves the lemma.  $\square$

**Lemma A.4.** Assume the hypothesis of Theorem 4.2 and let  $\mathbf{x}^+$  be as defined in (3). Then,  $\forall \mathbf{z}$  s.t.  $\langle \mathbf{z}, \mathbf{x}^* \rangle = 0$ , the following holds (w.p.  $\geq 1 - \frac{\eta}{4} e^{-n}$ ):  $|\langle \mathbf{z}, \mathbf{x}^+ \rangle| \leq \frac{5}{9} \text{dist}(\mathbf{x}^*, \mathbf{x})$ .

*Proof.* Fix  $\mathbf{z}$  such that  $\langle \mathbf{z}, \mathbf{x}^* \rangle = 0$ . Since the distribution of  $\mathbf{A}$  is rotationally invariant, wlog we can assume that: a)  $\mathbf{x}^* = \mathbf{e}_1$ , b)  $\mathbf{x} = \alpha \mathbf{e}_1 + \sqrt{1 - \alpha^2} \mathbf{e}_2$  where  $\alpha \in \mathbb{R}$  and  $\alpha \geq 0$  and c)  $\mathbf{z} = \beta \mathbf{e}_2 + \sqrt{1 - |\beta|^2} \mathbf{e}_3$  for some  $\beta \in \mathbb{C}$ . Note that we first prove the lemma for a *fixed*  $\mathbf{z}$  and then using union bound, we obtain the result  $\forall \mathbf{z} \in \mathbb{C}^n$ . We have:

$$|\langle \mathbf{z}, \mathbf{x}^+ \rangle| \leq |\beta| |\langle \mathbf{e}_2, \mathbf{x}^+ \rangle| + \sqrt{1 - |\beta|^2} |\langle \mathbf{e}_3, \mathbf{x}^+ \rangle|. \quad (10)$$

Now,

$$\begin{aligned}
|\mathbf{e}_2^T \mathbf{x}^+| &= \left| \mathbf{e}_2^T (\mathbf{A} \mathbf{A}^T)^{-1} \mathbf{A} (\mathbf{D} - \mathbf{I}) \mathbf{A}^T \mathbf{e}_1 \right| \\
&\leq \frac{1}{2m} \left| \mathbf{e}_2^T \left( \left( \frac{1}{2m} \mathbf{A} \mathbf{A}^T \right)^{-1} - \mathbf{I} \right) \mathbf{A} (\mathbf{D} - \mathbf{I}) \mathbf{A}^T \mathbf{e}_1 \right| + \frac{1}{2m} |\mathbf{e}_2^T \mathbf{A} (\mathbf{D} - \mathbf{I}) \mathbf{A}^T \mathbf{e}_1| \\
&\leq \frac{1}{2m} \left\| \left( \frac{1}{2m} \mathbf{A} \mathbf{A}^T \right)^{-1} - \mathbf{I} \right\|_2 \|\mathbf{A}\|_2 \|(\mathbf{D} - \mathbf{I}) \mathbf{A}^T \mathbf{e}_1\|_2 + \frac{1}{2m} |\mathbf{e}_2^T \mathbf{A} (\mathbf{D} - \mathbf{I}) \mathbf{A}^T \mathbf{e}_1|, \\
&\leq \frac{4c}{\sqrt{c}} \text{dist}(\mathbf{x}^t, \mathbf{x}^*) + \frac{1}{2m} |\mathbf{e}_2^T \mathbf{A} (\mathbf{D} - \mathbf{I}) \mathbf{A}^T \mathbf{e}_1|, \quad (11)
\end{aligned}$$

where the last inequality follows from the proof of Lemma A.2.

Similarly,

$$\begin{aligned}
|\mathbf{e}_3^T \mathbf{x}^+| &= \left| \mathbf{e}_3^T (\mathbf{A}\mathbf{A}^T)^{-1} \mathbf{A} (\mathbf{D} - \mathbf{I}) \mathbf{A}^T \mathbf{e}_1 \right| \\
&\leq \frac{1}{2m} \left| \mathbf{e}_3^T \left( \left( \frac{1}{2m} \mathbf{A}\mathbf{A}^T \right)^{-1} - \mathbf{I} \right) \mathbf{A} (\mathbf{D} - \mathbf{I}) \mathbf{A}^T \mathbf{e}_1 \right| + \frac{1}{2m} |\mathbf{e}_3^T \mathbf{A} (\mathbf{D} - \mathbf{I}) \mathbf{A}^T \mathbf{e}_1| \\
&\leq \frac{1}{2m} \left\| \left( \frac{1}{2m} \mathbf{A}\mathbf{A}^T \right)^{-1} - \mathbf{I} \right\|_2 \|\mathbf{A}\|_2 \|(\mathbf{D} - \mathbf{I}) \mathbf{A}^T \mathbf{e}_1\|_2 + \frac{1}{2m} |\mathbf{e}_3^T \mathbf{A} (\mathbf{D} - \mathbf{I}) \mathbf{A}^T \mathbf{e}_1| \\
&\leq \frac{4c}{\sqrt{c}} \text{dist}(\mathbf{x}^t, \mathbf{x}^*) + \frac{1}{2m} |\mathbf{e}_3^T \mathbf{A} (\mathbf{D} - \mathbf{I}) \mathbf{A}^T \mathbf{e}_1|, \tag{12}
\end{aligned}$$

Again, the last inequality follows from the proof of Lemma A.2. The lemma now follows by using (10), (11), (12) along with Lemmas A.5 and A.6.  $\square$

**Lemma A.5.** *Assume the hypothesis of Theorem 4.2 and the notation therein. Then,*

$$|\mathbf{e}_2^T \mathbf{A} (\mathbf{D} - \mathbf{I}) \mathbf{A}^T \mathbf{e}_1| \leq \frac{100}{99} m \sqrt{1 - \alpha^2},$$

with probability greater than  $1 - \frac{\eta}{10} e^{-n}$ .

*Proof.* We have:

$$\begin{aligned}
\mathbf{e}_2^T \mathbf{A} (\mathbf{D} - \mathbf{I}) \mathbf{A}^T \mathbf{e}_1 &= \sum_{l=1}^m \bar{a}_{1l} a_{2l} \left( \text{Ph} \left( \left( \alpha \bar{a}_{1l} + \sqrt{1 - \alpha^2} \bar{a}_{2l} \right) a_{1l} \right) - 1 \right) \\
&= \sum_{l=1}^m |a_{1l}| a'_{2l} \left( \text{Ph} \left( \alpha |a_{1l}| + \sqrt{1 - \alpha^2} a'_{2l} \right) - 1 \right),
\end{aligned}$$

where  $a'_{2l} \stackrel{\text{def}}{=} a_{2l} \text{Ph}(\bar{a}_{1l})$  is identically distributed to  $a_{2l}$  and is independent of  $|a_{1l}|$ . Define the random variable  $U_l$  as:

$$U_l \stackrel{\text{def}}{=} |a_{1l}| a'_{2l} \left( \text{Ph} \left( 1 + \frac{\sqrt{1 - \alpha^2} a'_{2l}}{\alpha |a_{1l}|} \right) - 1 \right).$$

Similar to Lemma A.2, we will calculate  $\mathbb{P}[U_l > t]$  to show that  $U_l$  is subexponential and use it to derive concentration bounds. However, using the above estimate to bound  $\mathbb{E}[U_l]$  will result in a weak bound that we will not be able to use. Lemma 4.3 bounds  $\mathbb{E}[U_l]$  using a different technique carefully.

$$\begin{aligned}
\mathbb{P}[|U_l| > t] &\leq \mathbb{P} \left[ |a_{1l}| |a'_{2l}| \frac{c\sqrt{1 - \alpha^2} |a'_{2l}|}{\alpha |a_{1l}|} > t \right] \\
&= \mathbb{P} \left[ |a'_{2l}|^2 > \frac{c\alpha t}{\sqrt{1 - \alpha^2}} \right] \leq \exp \left( 1 - \frac{c\alpha t}{\sqrt{1 - \alpha^2}} \right),
\end{aligned}$$

where the last step follows from the fact that  $a'_{2l}$  is a subgaussian random variable and hence  $|a'_{2l}|^2$  is a subexponential random variable. Using Proposition 5.16 from [27], we obtain:

$$\begin{aligned}
\mathbb{P} \left[ \left| \sum_{l=1}^m U_l - \mathbb{E}[U_l] \right| > \delta m \sqrt{1 - \alpha^2} \right] &\leq 2 \exp \left( - \min \left( \frac{c\delta^2 m^2 (1 - \alpha^2)}{(1 - \alpha^2) m}, \frac{c\delta m \sqrt{1 - \alpha^2}}{\sqrt{1 - \alpha^2}} \right) \right) \\
&\leq 2 \exp(-c\delta^2 m) \leq \frac{\eta}{10} \exp(-n).
\end{aligned}$$

Using Lemma 4.3, we obtain:

$$|\mathbf{e}_2^T \mathbf{A} (\mathbf{D} - \mathbf{I}) \mathbf{A}^T \mathbf{e}_1| = \left| \sum_{l=1}^m U_l \right| \leq (1 + \delta) m \sqrt{1 - \alpha^2},$$

with probability greater than  $1 - \frac{\eta}{10} \exp(-n)$ . This proves the lemma.  $\square$

*Proof of Lemma 4.3.* Let  $w_2 = |w_2| e^{i\theta}$ . Then  $|w_1|$ ,  $|w_2|$  and  $\theta$  are all independent random variables.  $\theta$  is a uniform random variable over  $[-\pi, \pi]$  and  $|w_1|$  and  $|w_2|$  are identically distributed with probability distribution function:

$$p(x) = x \exp\left(-\frac{x^2}{2}\right) \mathbb{1}_{\{x \geq 0\}}.$$

We have:

$$\begin{aligned} \mathbb{E}[U] &= \mathbb{E}\left[|w_1| |w_2| e^{i\theta} \left(\text{Ph}\left(1 + \frac{\sqrt{1-\alpha^2} |w_2| e^{-i\theta}}{\alpha |w_1|}\right) - 1\right)\right] \\ &= \mathbb{E}\left[|w_1| |w_2| \mathbb{E}\left[e^{i\theta} \left(\text{Ph}\left(1 + \frac{\sqrt{1-\alpha^2} |w_2| e^{-i\theta}}{\alpha |w_1|}\right) - 1\right) \middle| |w_1|, |w_2|\right]\right] \end{aligned}$$

Let  $\beta \stackrel{\text{def}}{=} \frac{\sqrt{1-\alpha^2} |w_2|}{\alpha |w_1|}$ . We will first calculate  $\mathbb{E}[e^{i\theta} \text{Ph}(1 + \beta e^{-i\theta}) | |w_1|, |w_2|]$ . Note that the above expectation is taken only over the randomness in  $\theta$ . For simplicity of notation, we will drop the conditioning variables, and calculate the above expectation in terms of  $\beta$ .

$$\begin{aligned} e^{i\theta} \text{Ph}(1 + \beta e^{-i\theta}) &= (\cos \theta + i \sin \theta) \frac{1 + \beta \cos \theta - i \beta \sin \theta}{\left[(1 + \beta \cos \theta)^2 + \beta^2 \sin^2 \theta\right]^{\frac{1}{2}}} \\ &= \frac{\cos \theta + \beta + i \sin \theta}{(1 + \beta^2 + 2\beta \cos \theta)^{\frac{1}{2}}}. \end{aligned}$$

We will first calculate the imaginary part of the above expectation:

$$\text{Im}(\mathbb{E}[e^{i\theta} \text{Ph}(1 + \beta e^{-i\theta})]) = \mathbb{E}\left[\frac{\sin \theta}{(1 + \beta^2 + 2\beta \cos \theta)^{\frac{1}{2}}}\right] = 0, \quad (13)$$

where the last step follows because we are taking the expectation of an odd function. Focusing on the real part, we let:

$$\begin{aligned} F(\beta) &\stackrel{\text{def}}{=} \mathbb{E}\left[\frac{\cos \theta + \beta}{(1 + \beta^2 + 2\beta \cos \theta)^{\frac{1}{2}}}\right] \\ &= \frac{1}{2\pi} \int_{-\pi}^{\pi} \frac{\cos \theta + \beta}{(1 + \beta^2 + 2\beta \cos \theta)^{\frac{1}{2}}} d\theta. \end{aligned}$$

Note that  $F(\beta) : \mathbb{R} \rightarrow \mathbb{R}$  and  $F(0) = 0$ . We will show that there is a small absolute numerical constant  $\gamma$  (depending on  $\delta$ ) such that:

$$0 < \beta < \gamma \Rightarrow |F(\beta)| \leq \left(\frac{1}{2} + \delta\right)\beta. \quad (14)$$

We show this by calculating  $F'(0)$  and using the continuity of  $F'(\beta)$  at  $\beta = 0$ . We first calculate  $F'(\beta)$  as follows:

$$\begin{aligned} F'(\beta) &= \frac{1}{2\pi} \int_{-\pi}^{\pi} \frac{1}{(1 + \beta^2 + 2\beta \cos \theta)^{\frac{1}{2}}} - \frac{(\cos \theta + \beta)(\beta + \cos \theta)}{(1 + \beta^2 + 2\beta \cos \theta)^{\frac{3}{2}}} d\theta \\ &= \frac{1}{2\pi} \int_{-\pi}^{\pi} \frac{\sin^2 \theta}{(1 + \beta^2 + 2\beta \cos \theta)^{\frac{3}{2}}} d\theta \end{aligned}$$

From the above, we see that  $F'(0) = \frac{1}{2}$  and (14) then follows from the continuity of  $F'(\beta)$  at  $\beta = 0$ . Getting back to the expected value of  $\bar{U}$ , we have:

$$\begin{aligned}
|\mathbb{E}[U]| &= \left| \mathbb{E} \left[ |w_1| |w_2| F \left( \frac{\sqrt{1-\alpha^2} |w_2|}{\alpha |w_1|} \right) \mathbb{1}_{\left\{ \frac{\sqrt{1-\alpha^2} |w_2|}{\alpha |w_1|} < \gamma \right\}} \right] \right. \\
&\quad \left. + \mathbb{E} \left[ |w_1| |w_2| F \left( \frac{\sqrt{1-\alpha^2} |w_2|}{\alpha |w_1|} \right) \mathbb{1}_{\left\{ \frac{\sqrt{1-\alpha^2} |w_2|}{\alpha |w_1|} \geq \gamma \right\}} \right] \right| \\
&= \left| \mathbb{E} \left[ |w_1| |w_2| F \left( \frac{\sqrt{1-\alpha^2} |w_2|}{\alpha |w_1|} \right) \mathbb{1}_{\left\{ \frac{\sqrt{1-\alpha^2} |w_2|}{\alpha |w_1|} < \gamma \right\}} \right] \right| \\
&\quad + \left| \mathbb{E} \left[ |w_1| |w_2| F \left( \frac{\sqrt{1-\alpha^2} |w_2|}{\alpha |w_1|} \right) \mathbb{1}_{\left\{ \frac{\sqrt{1-\alpha^2} |w_2|}{\alpha |w_1|} \geq \gamma \right\}} \right] \right| \\
&\stackrel{(\zeta_1)}{\leq} \left( \frac{1}{2} + \delta \right) \mathbb{E} \left[ |w_1| |w_2| \frac{\sqrt{1-\alpha^2} |w_2|}{\alpha |w_1|} \right] + \mathbb{E} \left[ |w_1| |w_2| \mathbb{1}_{\left\{ \frac{\sqrt{1-\alpha^2} |w_2|}{\alpha |w_1|} \geq \gamma \right\}} \right], \\
&= \left( \frac{1}{2} + \delta \right) \left( \frac{\sqrt{1-\alpha^2}}{\alpha} \right) \mathbb{E} [w_2^2] + \mathbb{E} \left[ |w_1| |w_2| \mathbb{1}_{\left\{ \frac{\sqrt{1-\alpha^2} |w_2|}{\alpha |w_1|} \geq \gamma \right\}} \right], \\
&\stackrel{(\zeta_2)}{=} (1 + 2\delta) \left( \frac{\sqrt{1-\alpha^2}}{\alpha} \right) + \mathbb{E} \left[ |w_1| |w_2| \mathbb{1}_{\left\{ \frac{\sqrt{1-\alpha^2} |w_2|}{\alpha |w_1|} \geq \gamma \right\}} \right], \tag{15}
\end{aligned}$$

where  $(\zeta_1)$  follows from (14) and the fact that  $|F(\beta)| \leq 1$  for every  $\beta$  and  $(\zeta_2)$  follows from the fact that  $\mathbb{E} [z_2^2] = 2$ . We will now bound the second term in the above inequality. We start with the following integral:

$$\begin{aligned}
\int_t^\infty s^2 e^{-\frac{s^2}{2}} ds &= - \int_t^\infty s d \left( e^{-\frac{s^2}{2}} \right) \\
&= t e^{-\frac{t^2}{2}} + \int_t^\infty e^{-\frac{s^2}{2}} ds \leq (t + e) e^{-\frac{t^2}{c}}, \tag{16}
\end{aligned}$$

where  $c$  is some constant. The last step follows from standard bounds on the tail probabilities of gaussian random variables. We now bound the second term of (15) as follows:

$$\begin{aligned}
\mathbb{E} \left[ |w_1| |w_2| \mathbb{1}_{\left\{ \frac{\sqrt{1-\alpha^2} |w_2|}{\alpha |w_1|} \geq \gamma \right\}} \right] &= \int_0^\infty t^2 e^{-\frac{t^2}{2}} \int_{\frac{\alpha t}{\sqrt{1-\alpha^2}}}^\infty s^2 e^{-\frac{s^2}{2}} ds dt \\
&\stackrel{(\zeta_1)}{\leq} \int_0^\infty t^2 e^{-\frac{t^2}{2}} \left( \frac{\alpha t}{\sqrt{1-\alpha^2}} + e \right) e^{-\frac{\alpha^2 t^2}{c(1-\alpha^2)}} dt \\
&\leq \int_0^\infty \left( \frac{\alpha t^3}{\sqrt{1-\alpha^2}} + e t^2 \right) e^{-\frac{t^2}{c(1-\alpha^2)}} dt \\
&= \frac{\alpha}{\sqrt{1-\alpha^2}} \int_0^\infty t^3 e^{-\frac{t^2}{c(1-\alpha^2)}} dt + e \int_0^\infty t^2 e^{-\frac{t^2}{c(1-\alpha^2)}} dt \\
&\stackrel{(\zeta_2)}{\leq} c (1-\alpha^2)^{\frac{3}{2}} \stackrel{(\zeta_3)}{\leq} \delta \sqrt{1-\alpha^2}
\end{aligned}$$

where  $(\zeta_1)$  follows from (16),  $(\zeta_2)$  follows from the formulae for second and third absolute moments of gaussian random variables and  $(\zeta_3)$  follows from the fact that  $1 - \alpha^2 < \delta$ . Plugging the above inequality in (15), we obtain:

$$|\mathbb{E}[U]| \leq (1 + 2\delta) \left( \frac{\sqrt{1-\alpha^2}}{\alpha} \right) + \delta \sqrt{1-\alpha^2} \leq (1 + 4\delta) \sqrt{1-\alpha^2},$$

where we used the fact that  $\alpha \geq 1 - \frac{\delta}{2}$ . This proves the lemma.  $\square$

**Lemma A.6.** Assume the hypothesis of Theorem 4.2 and the notation therein. Then,

$$|\mathbf{e}_3^T \mathbf{A} (\mathbf{D} - \mathbf{I}) \mathbf{A}^T \mathbf{e}_1| \leq \delta m \sqrt{1 - \alpha^2},$$

with probability greater than  $1 - \frac{\eta}{10} e^{-n}$ .

*Proof.* The proof of this lemma is very similar to that of Lemma A.5. We have:

$$\begin{aligned} \mathbf{e}_3^T \mathbf{A} (\mathbf{D} - \mathbf{I}) \mathbf{A}^T \mathbf{e}_1 &= \sum_{l=1}^m \bar{a}_{1l} a_{3l} \left( \text{Ph} \left( \left( \alpha \bar{a}_{1l} + \bar{a}_{2l} \sqrt{1 - \alpha^2} \bar{a}_{3l} \right) a_{1l} \right) - 1 \right) \\ &= \sum_{l=1}^m |a_{1l}| a'_{3l} \left( \text{Ph} \left( \alpha |a_{1l}| + \bar{a}'_{2l} \sqrt{1 - \alpha^2} \right) - 1 \right), \end{aligned}$$

where  $a'_{3l} \stackrel{\text{def}}{=} a_{3l} \text{Ph}(\bar{a}_{1l})$  is identically distributed to  $a_{3l}$  and is independent of  $|a_{1l}|$  and  $a'_{2l}$ . Define the random variable  $U_l$  as:

$$U_l \stackrel{\text{def}}{=} |a_{1l}| a'_{3l} \left( \text{Ph} \left( 1 + \frac{\bar{a}'_{2l} \sqrt{1 - \alpha^2}}{\alpha |a_{1l}|} \right) - 1 \right).$$

Since  $a'_{3l}$  has mean zero and is independent of everything else, we have:

$$\mathbb{E}[U_l] = 0.$$

Similar to Lemma A.5, we will calculate  $\mathbb{P}[U_l > t]$  to show that  $U_l$  is subexponential and use it to derive concentration bounds.

$$\begin{aligned} \mathbb{P}[|U_l| > t] &\leq \mathbb{P} \left[ |a_{1l}| |a'_{3l}| \frac{c\sqrt{1 - \alpha^2} |a'_{2l}|}{\alpha |a_{1l}|} > t \right] \\ &= \mathbb{P} \left[ |a'_{2l} a'_{3l}| > \frac{c\alpha t}{\sqrt{1 - \alpha^2}} \right] \leq \exp \left( 1 - \frac{c\alpha t}{\sqrt{1 - \alpha^2}} \right), \end{aligned}$$

where the last step follows from the fact that  $a'_{2l}$  and  $a'_{3l}$  are independent subgaussian random variables and hence  $|a'_{2l} a'_{3l}|$  is a subexponential random variable. Using Proposition 5.16 from [27], we obtain:

$$\begin{aligned} \mathbb{P} \left[ \left| \sum_{l=1}^m U_l - \mathbb{E}[U_l] \right| > \delta m \sqrt{1 - \alpha^2} \right] &\leq 2 \exp \left( - \min \left( \frac{c\delta^2 m^2 (1 - \alpha^2)}{(1 - \alpha^2) m}, \frac{c\delta m \sqrt{1 - \alpha^2}}{\sqrt{1 - \alpha^2}} \right) \right) \\ &\leq 2 \exp(-c\delta^2 m) \leq \frac{\eta}{10} \exp(-n). \end{aligned}$$

Hence, we have:

$$|\mathbf{e}_3^T \mathbf{A} (\mathbf{D} - \mathbf{I}) \mathbf{A}^T \mathbf{e}_1| = \left| \sum_{l=1}^m U_l \right| \leq \delta m \sqrt{1 - \alpha^2},$$

with probability greater than  $1 - \frac{\eta}{10} \exp(-n)$ . This proves the lemma.  $\square$

**Lemma A.7.** For every  $w \in \mathbb{C}$ , we have:

$$|\text{Ph}(1 + w) - 1| \leq 2|w|.$$

*Proof.* The proof is straight forward:

$$|\text{Ph}(1 + w) - 1| \leq |\text{Ph}(1 + w) - (1 + w)| + |w| = |1 - |1 + w|| + |w| \leq 2|w|.$$

$\square$

## B Proofs for Section 5

*Proof of Lemma 5.1.* For every  $j \in [n]$  and  $i \in [m]$ , consider the random variable  $Z_{ij} \stackrel{\text{def}}{=} |a_{ij}y_i|$ . We have the following:

- if  $j \in S$ , then

$$\begin{aligned} \mathbb{E}[Z_{ij}] &= \frac{2}{\pi} \left( \sqrt{1 - (x_j^*)^2} + x_j^* \arcsin x_j^* \right) \\ &\geq \frac{2}{\pi} \left( 1 - \frac{5}{6} (x_j^*)^2 - \frac{1}{6} (x_j^*)^4 + x_j^* \left( x_j^* + \frac{1}{6} (x_j^*)^3 \right) \right) \\ &\geq \frac{2}{\pi} + \frac{1}{6} (x_{\min}^*)^2, \end{aligned}$$

where the first step follows from Corollary 3.1 in [17] and the second step follows from the Taylor series expansions of  $\sqrt{1 - x^2}$  and  $\arcsin(x)$ ,

- if  $j \notin S$ , then  $\mathbb{E}[Z_{ij}] = \mathbb{E}[|a_{ij}|] \mathbb{E}[|y_i|] = \frac{2}{\pi}$  and finally,
- for every  $j \in [n]$ ,  $Z_{ij}$  is a sub-exponential random variable with parameter  $c = O(1)$  (since it is a product of two standard normal random variables).

Using the hypothesis of the theorem about  $m$ , we have:

- for any  $j \in S$ ,  $\mathbb{P} \left[ \frac{1}{m} \sum_{i=1}^m Z_{ij} - \left( \frac{2}{\pi} + \frac{1}{12} (x_{\min}^*)^2 \right) < 0 \right] \leq \exp \left( -c (x_{\min}^*)^4 m \right) \leq \delta n^{-c}$ , and
- for any  $j \notin S$ ,  $\mathbb{P} \left[ \frac{1}{m} \sum_{i=1}^m Z_{ij} - \left( \frac{2}{\pi} + \frac{1}{12} (x_{\min}^*)^2 \right) > 0 \right] \leq \exp \left( -c (x_{\min}^*)^4 m \right) \leq \delta n^{-c}$ .

Applying a union bound to the above, we see that with probability greater than  $1 - \delta$ , there is a separation in the values of  $\frac{1}{m} \sum_{i=1}^m Z_{ij}$  for  $j \in S$  and  $j \notin S$ . This proves the theorem.  $\square$
